# Supplementary material
Source: publisher figshare collection journal article supplement (https://acs.figshare.com/ndownloader/files/17620238)
Supplement: Supplementary file 1 [file 17620238]

Compound	SMILES	PDHK1 IC50 (¥ìM)	PDHK2 IC50 (¥ìM)	PDHK3 IC50 (¥ìM)	PDHK4 IC50 (¥ìM)	HSP90 IC50 (¥ìM)	H1299 GI50 (¥ìM)	DU145 GI50 (¥ìM)	PDHK2 (PDH assay) IC50 (¥ìM)	PDHK4 (PDH assay) IC50 (¥ìM)
6	OC1=CC(O)=C(C(N(C2=CC=C(C3=NC(Cl)=NC=C3C)C=C2)CC4=CC=C(CNC(C(F)F)=O)C=C4)=O)C=C1	0.03	0.053	0.03	0.024		> 50
14	OC1=C(C(N(CC2=CC=C(NC(C)=O)C=C2)C3=CC=C(C(O)=O)C=C3)=O)C=CC(O)=C1		7.22		4.67
15a	OC1=C(C(N(CC2=CC=C(NC(C)=O)C=C2)C3=CC=C(C(NC4CC4)=O)C=C3)=O)C=CC(O)=C1		1.96		14.75
15b	OC1=C(C(N(CC2=CC=C(NC(C)=O)C=C2)C3=CC=C(C(NC)=O)C=C3)=O)C=CC(O)=C1		8.59		7.84
15c	OC1=C(C(N(CC2=CC=C(NC(C)=O)C=C2)C3=CC=C(C(NCCO)=O)C=C3)=O)C=CC(O)=C1		9.91		12.26
15d	OC1=C(C(N(CC2=CC=C(NC(C)=O)C=C2)C3=CC=C(C(N(C)C)=O)C=C3)=O)C=CC(O)=C1		0.503		0.311
15e	OC1=C(C(N(CC2=CC=C(NC(C)=O)C=C2)C3=CC=C(C(N4CCCCC4)=O)C=C3)=O)C=CC(O)=C1		1.62		1.98
15f	OC1=C(C(N(CC2=CC=C(NC(C)=O)C=C2)C3=CC=C(C(N4CCOCC4)=O)C=C3)=O)C=CC(O)=C1		2.66		5.793
15g	OC1=C(C(N(CC2=CC=C(NC(C)=O)C=C2)C3=CC=C(C(N4CCCC4)=O)C=C3)=O)C=CC(O)=C1		1.66		1.81
19a	OC1=C(C(N(CC2=CC=CC=C2)C3=CC=C(C(N(C)C)=O)C=C3)=O)C=CC(O)=C1	0.109	0.206	0.186	0.066
19b	OC1=C(C(N(CC2=CC=C(F)C=C2)C3=CC=C(C(N(C)C)=O)C=C3)=O)C=CC(O)=C1	0.034	0.108	0.144	0.061	7.984	57.1 ¡¾ 4.3	69.7 ¡¾ 29.0
19c	OC1=C(C(N(CC2=CC=C(Cl)C=C2)C3=CC=C(C(N(C)C)=O)C=C3)=O)C=CC(O)=C1		0.126		0.169		31.5 ¡¾ 2.6
19d	OC1=C(C(N(CC2=CC=C(C(F)(F)F)C=C2)C3=CC=C(C(N(C)C)=O)C=C3)=O)C=CC(O)=C1		0.119		0.268	> 10
19e	OC1=C(C(N(CC2=CC=C([N+]([O-])=O)C=C2)C3=CC=C(C(N(C)C)=O)C=C3)=O)C=CC(O)=C1		0.11		0.099		97.1 ¡¾ 2.9	44.5 ¡¾ 20.0
19f	OC1=C(C(N(CC2=CC=C(C#N)C=C2)C3=CC=C(C(N(C)C)=O)C=C3)=O)C=CC(O)=C1	0.151	0.302	0.461	0.399
19g	OC1=C(C(N(CC2=CC=C(O)C=C2)C3=CC=C(C(N(C)C)=O)C=C3)=O)C=CC(O)=C1	0.152	0.178	0.182	0.033	> 10	4.9 ¡¾ 0.9	3.5 ¡¾ 0.2	1.455	1.088
19h	OC1=C(C(N(CC2=CC(C=CC=C3)=C3C=C2)C4=CC=C(C(N(C)C)=O)C=C4)=O)C=CC(O)=C1		0.373		0.234
19i	OC1=C(C(N(CC(C)(C)C)C2=CC=C(C(N(C)C)=O)C=C2)=O)C=CC(O)=C1		0.772		5.33
19j	OC1=C(C(N(CC2CCCCC2)C3=CC=C(C(N(C)C)=O)C=C3)=O)C=CC(O)=C1	0.14	0.184	0.858	0.775
19k	OC1=C(C(N(CC2=CC=CO2)C3=CC=C(C(N(C)C)=O)C=C3)=O)C=CC(O)=C1	0.023	0.155	0.063	0.079	1.187	7.8 ¡¾ 1.7	9.0 ¡¾ 0.8	2.087	1.311
19l	OC1=C(C(N(CC2=CC=C(C)O2)C3=CC=C(C(N(C)C)=O)C=C3)=O)C=CC(O)=C1	0.02	0.252	0.255	0.052
19m	OC1=C(C(N(CC2=CC=C(Cl)O2)C3=CC=C(C(N(C)C)=O)C=C3)=O)C=CC(O)=C1	0.024	0.193	0.181	0.082		30.02 ¡¾ 4.58
19n	OC1=C(C(N(CC2=CC=C(Br)O2)C3=CC=C(C(N(C)C)=O)C=C3)=O)C=CC(O)=C1	0.036	0.008	0.081	0.005	1.385	13.4 ¡¾ 2.6	10.2 ¡¾ 22.4	0.58	0.31
19o	OC1=C(C(N(CC2=CC=C(I)O2)C3=CC=C(C(N(C)C)=O)C=C3)=O)C=CC(O)=C1	0.014	0.098	0.005	0.011		39.19 ¡¾ 5.3	15.9 ¡¾ 2.0
19p	OC1=C(C(N(CC2=CC=C(Br)S2)C3=CC=C(C(N(C)C)=O)C=C3)=O)C=CC(O)=C1	0.042	0.018	0.09	0.008		49.8 ¡¾ 8.9	42.25 ¡¾ 1.5
19q	OC1=C(C(N(CC2=CC=C(C#N)S2)C3=CC=C(C(N(C)C)=O)C=C3)=O)C=CC(O)=C1	0.057	0.095	0.098	0.089		107.2 ¡¾ 24.3	59.8 ¡¾ 6.8
19r	OC1=C(C(N(CC2=CN=C(Br)S2)C3=CC=C(C(N(C)C)=O)C=C3)=O)C=CC(O)=C1	0.024	0.132	0.09	0.087		32.16 ¡¾ 2.15
19s	OC1=C(C(N(CC2=NC=C(Br)S2)C3=CC=C(C(N(C)C)=O)C=C3)=O)C=CC(O)=C1	0.015	0.069	0.095	0.008		60.2 ¡¾ 29.4	40.8 ¡¾ 2.2
19t	OC1=C(C(N(CC2=CC(Br)=CS2)C3=CC=C(C(N(C)C)=O)C=C3)=O)C=CC(O)=C1	0.002	0.006	0.139	0.002	8.448	51.6 ¡¾ 3.2	41.9 ¡¾ 4.9
21a	OC1=CC=C(C(N(CC2=CC=C(F)C=C2)C3=CC=C(C(N(C)C)=O)C=C3)=O)C=C1		2.04		0.39
21b	O=C(N(CC1=CC=C(F)C=C1)C2=CC=C(C(N(C)C)=O)C=C2)C3=C(O)C=CC=C3		> 10		> 10
